# Supplementary material for: Mental Health and Psychosocial Quality-of-Life Burden Among Patients With Vitiligo: Findings From the Global VALIANT Study
Source: PubMed Central journal article supplement — JAMA Dermatol. 2023 Aug 30;159(10):1124–8. doi: 10.1001/jamadermatol.2023.2787 (PMC10469285; doi:10.1001/jamadermatol.2023.2787), 2023-08-30
Supplement: jamadermatol-e232787-s002.pdf [file jamadermatol-e232787-s002.pdf]

## **Data Sharing Statement**

Bibeau. Mental Health and Psychosocial Quality-of-Life Burden Among Patients With Vitiligo. *JAMA Dermatol*. Published August 30, 2023. doi:10.1001/jamadermatol.2023.2787

### **Data**

**Data available:** No
